# Supplementary material for: Post-COVID-19 dyspnoea and pulmonary imaging: a systematic review and meta-analysis
Source: PubMed Central journal article supplement — Eur Respir Rev. 2023 Aug 9;32(169):220253. doi: 10.1183/16000617.0253-2022 (PMC10410398; doi:10.1183/16000617.0253-2022), 2023-08-09
Supplement: ERR-0253-2022.SUPPLEMENT.pdf [file ERR-0253-2022.SUPPLEMENT.pdf]

## **Supplementary Materials**

### ***Pulmonary Function Test Measurement Changes Over Time***

Of the 47 studies included in the meta-analysis of imaging abnormalities, 26 also assessed PFTs and reported values as a percentage of predicted norms (**Table S1**). **Table S3** presents a summary of the results obtained from the REML, including overall means, and standard deviations of PFTs.

FEV<sub>1</sub>/FVC (%), was reported in 17 studies, eight of which occurred at early-follow-up. The raw means (95% CI) were 85.4 (79.2-91.6) for all timepoints, 85.4 (78.8-92.0) for early follow-up, and 86.5 (80.8-92.2) for late follow-up. Interstudy heterogeneity was highest between early follow-up studies ( $I^2 = 99.34\%$ ), followed by all timepoints ( $I^2 = 99.20\%$ ), and then late follow-up ( $I^2 = 99.03\%$ ). No heterogeneity was associated with follow-up time, and the relationship between FEV<sub>1</sub>/FVC, and follow-up time was not significant ( $p = 0.80$ ).

23 studies evaluated FEV<sub>1</sub> percent predicted (%pred), and the raw mean for all of these was 91.4 (88.2-94.6). The raw mean FEV<sub>1</sub> %pred for the 12 studies with an early follow-up time was 91.4 (87.5-95.3), and 96.2 (94.2-98.3) for the 11 studies with a late follow-up time. The  $I^2$  values were 90.75%, 93.82%, and 75.55%, respectively. The  $R^2$  was 18.40%, and follow-up time was significantly associated with increased FEV<sub>1</sub> ( $p = 0.03$ ).

24 studies reported FVC %pred. 11 of these had an early follow-up. The raw mean FVC %pred for all timepoints, early follow-up, and late follow-up were 92.5 (88.0-97.0), 92.5 (87.5-97.5), and 96.1 (92.5-100.0), respectively. Interstudy heterogeneity for all timepoints was 94.73%, 95.17% in early follow-up and 93.89% in late follow-up. Heterogeneity due to follow-up was 0.53% and the relationship between follow-up time was not significant ( $p = 0.24$ ).

24 studies reported DLCO %pred, 12 at early follow-up. The raw mean of all timepoints for DLCO %pred was 76.1 (71.1-81.2). At the early timepoint, the mean was 76.1 (70.8-81.5), and

it was 84.7 (80.0-89.5) at late timepoint. Interstudy heterogeneity for each timepoint was 95.30%, 96.02%, and 94.28%, respectively. 17.57% of heterogeneity was accounted for by follow-up time. Follow-up time significantly impacted DLCO ( $p = 0.02$ ).

A meta-regression was performed between dyspnea and FEV1 (% predicted), and dyspnea and DLCO (% predicted). Neither were significantly correlated ( $p = 0.39, 0.16$ , respectively). The regression including the nine studies reporting both FEV1 and dyspnea had an  $R^2$  of 0.00%, and an  $I^2$  of 76.35%. The regression including DLCO also included nine studies and had slightly more interstudy heterogeneity ( $I^2 = 88.35\%$ ) and 7.39% of heterogeneity in DLCO was attributable to dyspnea proportions within the cohort. Furthermore, DLCO was not significantly associated with any given imaging abnormality. However, while the meta-analysis of all PFTs did not exhibit significant publication bias, the meta-regression between DLCO and CT abnormalities did have an Egger's test  $p$  value  $< 0.05$ .

After stepwise removal of studies which contributed to heterogeneity, our findings remain mostly the same. DLCO and FEV1 significantly changed over time between early and late follow-up time points, but remained in the normal range, while FEV1/FVC and FVC did not. Furthermore, the relationship between FEV1 and dyspnea, and DLCO and dyspnea also remained non-significant. However, the relationship between DLCO and imaging abnormalities became significant after the removal of these studies. Notably, GGOs and DLCO, and reticulations and DLCO were negatively correlated (i.e., higher average DLCO (% pred) was associated with a lower proportion of these abnormalities). The  $R^2$  for these meta regressions were 92.09%, and 97.49%, respectively ( $p < 0.0001, p < 0.0001$ ).

### ***Stepwise Removal of Studies in the proportion of Imaging Abnormalities and associated meta-regressions***

Results from the stepwise removal of heterogeneity are available in Table S4. Briefly, most of our findings are consistent with what was obtained prior to the removal of these studies.

However, many of the effects became much more pronounced. Notably, all specific abnormalities (GGOs, reticulations, bronchiectasis, consolidations, and fibrosis) significantly changed over time ( $p < 0.001$  for all). Interestingly, while most of these abnormalities decreased, fibrosis and bronchiectasis increased over time.

Likewise, the meta-regression relationships also became stronger. Dyspnea was significantly correlated with all abnormalities, CT-only, and GGOs ( $p < 0.0001$  for all). Age was significantly correlated with all abnormalities, CT-only, GGOs, reticulations, consolidations, bronchiectasis, and fibrosis ( $p < 0.0001$  for all). Female sex was negatively correlated with all abnormalities, CT-only, GGOs, reticulations, consolidations, bronchiectasis, and fibrosis ( $p < 0.0001$  for all).  $R^2$  values for these relationships exceeded 90%. Results are described in further detail in Table S5.

**Table S1. Summary of Studies Included in the Meta-Analysis**

| <b>Authors</b>              | <b>Country</b> | <b>Study Period (mm/yy)</b> | <b>Sample Size</b> | <b>Age, mean <math>\pm</math> SD or median [IQR] years</b> | <b>Acute COVID-19 Severity</b>                          | <b>Time from acute illness (months)</b> | <b>Imaging Technology</b> | <b>Outcomes used for meta-analysis</b>                                                                             |
|-----------------------------|----------------|-----------------------------|--------------------|------------------------------------------------------------|---------------------------------------------------------|-----------------------------------------|---------------------------|--------------------------------------------------------------------------------------------------------------------|
| <b>Balbi et. al.(23)</b>    | Italy          | 02/20 - 05/20               | 91                 | 66 [59-71]                                                 | Hospitalized                                            | 3                                       | CT                        | Total Patients with Any Imaging Abnormality, GGO, Reticulations, Consolidations, Dyspnea, PFTs                     |
| <b>Bardakci et. al.(24)</b> | Turkey         | 03/20 - 07/20               | 60                 | N/A                                                        | Hospitalized                                            | 6                                       | CT                        | Total Patients with Any Imaging Abnormality                                                                        |
| <b>Cao et. al.(26)</b>      | China          | 01/20 - 03/20               | 51                 | 43.5 $\pm$ 15.9                                            | Hospitalized , mixed severity                           | 3                                       | CT                        | Total Patients with Any Imaging Abnormality, GGO, Dyspnea                                                          |
| <b>Caruso et. al.(27)</b>   | Italy          | 03/20 - 05/20               | 118                | 65 $\pm$ 12                                                | Hospitalized with moderate to severe COVID-19 pneumonia | 6                                       | CT                        | Total Patients with Any Imaging Abnormality, GGO, Reticulations, Consolidations, Fibrosis, Bronchiectasis, Dyspnea |
| <b>Chen et. al.(28)</b>     | China          | 02/20 - 03/20               | 41                 | 51 [38-59]                                                 | Hospitalized , mixed severity                           | 3, 6, 12                                | CT                        | Total Patients with Any Imaging Abnormality, PFTs                                                                  |
| <b>Dai et. al.(29)</b>      | China          | 01/20 - 10/20               | 45                 | 48 $\pm$ 14                                                | Hospitalized , mixed severity                           | 6                                       | CT                        | Total Patients with Any Imaging Abnormality, GGO, Reticulations, Consolidations                                    |

|                                 |                    |               |     |                             |                                          |         |                                      |                                                                                                                          |
|---------------------------------|--------------------|---------------|-----|-----------------------------|------------------------------------------|---------|--------------------------------------|--------------------------------------------------------------------------------------------------------------------------|
| <b>Fortini et. al.(30)</b>      | Italy              | 03/20 - 05/20 | 59  | 68.2 ± 12.8                 | Hospitalized , not severe                | 3       | Ultrasound                           | Total Patients with Any Imaging Abnormality, Dyspnea, PFTs                                                               |
| <b>Frija-Masson et. al.(31)</b> | France             | 02/20 - 08/20 | 137 | 59 [50-68]                  | Hospitalized                             | 3       | CT                                   | GGO, Reticulations, Fibrosis', PFTs                                                                                      |
| <b>Froidure et. al.(32)</b>     | Belgium            | 03/20 - 06/20 | 107 | 60 [53–68]                  | Hospitalized , mixed severity            | 3       | CT                                   | GGO, Reticulations, Consolidations, Fibrosis, Dyspnea, PFTs                                                              |
| <b>Gamberini et. al.(33)</b>    | Italy              | 02/20 - 05/20 | 37  | 64 [55-70]                  | ICU                                      | 9 to 12 | CT                                   | GGO, Reticulations, Consolidations, Fibrosis. Bronchiectasis, PFTs                                                       |
| <b>Gianella et. al.(34)</b>     | Switzerland        | 03/20 - 04/20 | 39  | 62.5 [51-71]                | Hospitalized , mixed severity            | 3       | CT                                   | Total Patients with Any Imaging Abnormality, GGO, PFTs                                                                   |
| <b>Gonzalez et. al.(35)</b>     | Spain              | 03/20 - 06/20 | 57  | 60 [48-65]                  | ICU, experienced ARDS                    | 3       | CT                                   | Total Patients with Any Imaging Abnormality, GGO, Reticulations, Consolidations, Fibrosis, Bronchiectasis, Dyspnea, PFTs |
| <b>Grist et. al.(36)</b>        | The United Kingdom | 08/20 - 12/20 | 9   | 57 ± 7                      | Hospital, excluding invasive ventilation | 5       | Xenon Magnetic Resonance Imaging, CT | Total Patients with Any Imaging Abnormality, Dyspnea, PFTs                                                               |
| <b>Guler et. al.(37)</b>        | Switzerland        | 05/20 - 09/20 | 52  | Mild-52.9 ± 10.9<br>Severe- | Mixed                                    | 4       | CT                                   | Reticulations, Consolidations, Bronchiectasis                                                                            |

|                                |                 |               |     | Critical: 60.3 ± 12.0                            |                                                 |      |            |                                                                                                                 |
|--------------------------------|-----------------|---------------|-----|--------------------------------------------------|-------------------------------------------------|------|------------|-----------------------------------------------------------------------------------------------------------------|
| <b>Gurbani et. al. (71)</b>    | Spain           | 03/20-08/20   | 77  | 57±13.14                                         | Hospitalized                                    | 4    | Ultrasound | Total Patients with Any Imaging Abnormality, PFTs, Dyspnea                                                      |
| <b>Hellemons et. al.(38)</b>   | The Netherlands | 02/20 - 07/20 | 87  | 58.2 ± 12.3                                      | Hospitalized , ICU                              | 3, 6 | CT         | Total Patients with Any Imaging Abnormality, GGO, Reticulations, Consolidations, Fibrosis, Bronchiectasis, PFTs |
| <b>Holdsworth et. al. (70)</b> | UK              | 08/20-04/21   | 171 | 39 [30-46.7] range 17-61                         | Severe acute COVID illness (hospital admission) | 3    | CT         | Total Patients with Any Imaging Abnormality, GGO, Fibrosis, PFTs, Dyspnea                                       |
| <b>Hu et. al.(39)</b>          | China           | 01/20 - 24/20 | 18  | Moderate: 43.76 ± 12.89<br>Severe: 52.44 ± 11.88 | Hospitalized , no mechanical ventilation        | 5    | CT         | Total Patients with Any Imaging Abnormality, GGO                                                                |
| <b>Huang et. al.(40)</b>       | China           | 01/20 - 05/20 | 353 | 57 [47-65]                                       | Hospitalized                                    | 6    | CT         | Total Patients with Any Imaging Abnormality, GGO, Reticulations, Consolidations                                 |
| <b>Johnsen et. al.(41)</b>     | Denmark         | 03/20 - 08/20 | 57  | 51 ± 13                                          | Mixed, hospitalized , and non-hospitalized      | 3    | CT         | Total Patients with Any Imaging Abnormality, PFTs                                                               |
| <b>Jutant et. al. (68)</b>     | France          | 06/20-10/20   | 171 | 57.3±13.2                                        | ICU and non-ICU hospitalized                    | 4    | CT         | Total Patients with Any Imaging Abnormality, GGOs, Reticulations,                                               |

|                            |        |               |     |                                                                           |                                                                   |      |    |                                                                                                                                                      |
|----------------------------|--------|---------------|-----|---------------------------------------------------------------------------|-------------------------------------------------------------------|------|----|------------------------------------------------------------------------------------------------------------------------------------------------------|
| <b>Labarca et. al.(42)</b> | Chile  | 04/20 - 07/20 | 60  | Mild: 39.2 ± 14.3<br>Moderate: 47.4 ± 11<br>Severe: 50.0 ± 10.3           | Hospitalized from mild to severe                                  | 4    | CT | Fibrosis, Consolidations, PFTs, Dyspnea<br>Total Patients with Any Imaging Abnormality, GGO, Reticulations, Consolidations, Fibrosis, Bronchiectasis |
| <b>Lerum et. al.(43)</b>   | Norway | Mar-20        | 15  | ICU: 52 [50-59]                                                           | Hospitalized , ICU (note: only ICU cohort met inclusion criteria) | 3    | CT | GGO, PFTs                                                                                                                                            |
| <b>Li et. al.(44)</b>      | China  | 01/20 - 04/20 | 86  | Pulmonary Fibrosis: 33.06 ± 17.50<br>No pulmonary Fibrosis: 50.68 ± 13.25 | Hospitalized , mixed                                              | 3, 4 | CT | GGO, Bronchiectasis                                                                                                                                  |
| <b>Liao et. al.(45)</b>    | China  | 03/21 - 04/21 | 256 | 39.0 [33.0–48.0]                                                          | Hospitalized                                                      | 12   | CT | Total Patients with Any Imaging Abnormality, GGO, Reticulations, Consolidations, Fibrosis, Bronchiectasis, PFTs                                      |
| <b>Liu et. al.(46)</b>     | China  | 02/20 - 03/20 | 41  | 50 ± 14                                                                   | Hospitalized                                                      | 3, 7 | CT | GGO, Reticulations, Consolidations, Bronchiectasis                                                                                                   |

|                              |                              |               |                         |               |                                                 |          |              |                                                                                       |
|------------------------------|------------------------------|---------------|-------------------------|---------------|-------------------------------------------------|----------|--------------|---------------------------------------------------------------------------------------|
| <b>Luger et. al.(47)</b>     | Austria                      | 04/20 - 08/20 | 86                      | 57 [51-70]    | Hospitalized , mixed severity                   | 3, 6, 12 | CT           | Total Patients with Any Imaging Abnormality, GGO, Reticulations, Consolidations       |
| <b>Martino et. al. (67)</b>  | Italy                        | 03/20-05/20   | 52 (6 mo)<br>47 (12 mo) | 68 [56.5-75]  | Hospitalized                                    | 6, 12    | CT           | GGOs, Consolidations, Bronchiectasis, Reticulations, PFTs, Dyspnea                    |
| <b>McGroder et. al.(48)</b>  | The Unites States of America | 03/20 - 05/20 | 76                      | 54 ± 13.7     | Hospitalized                                    | 4        | CT           | Total Patients with Any Imaging Abnormality, GGO, Reticulations, Bronchiectasis, PFTs |
| <b>Miwa et. al.(49)</b>      | Japan                        | 04/20 - 12/20 | 17                      | 63 [59-67]    | Hospitalized , invasive mechanical ventilation  | 3        | CT           | Total Patients with Any Imaging Abnormality, GGO, Consolidations, PFTs                |
| <b>Mohr et. al.(50)</b>      | Germany                      | 04/20 - 09/20 | 10                      | 50 ± 13.1     | Hospitalized , some with mechanical ventilation | 4        | CT           | Total Patients with Any Imaging Abnormality, GGO                                      |
| <b>Muhammad et. al. (69)</b> | Pakistan                     | 03/21-03/22   | 173                     | 53.62         | Hospitalized                                    | 3, 6     | CT           | Fibrosis                                                                              |
| <b>Mumoli et. al.(51)</b>    | Italy                        | 05/20 - 08/20 | 77                      | 62.7 ± 9.5    | Hospitalized , mixed severity                   | 3        | CT and x-ray | Total Patients with Any Imaging Abnormality, GGO, Fibrosis, Dyspnea                   |
| <b>Nabahati et. al.(52)</b>  | Iran                         | Mar-20        | 173                     | 53.62 ± 13.67 | Hospitalized . Moderate or severe pneumonia     | 3, 6     | CT           | Fibrosis, Bronchiectasis                                                              |



|                                    |                    |                   |     |                     |                                                    |       |                            |                                                                                                     |
|------------------------------------|--------------------|-------------------|-----|---------------------|----------------------------------------------------|-------|----------------------------|-----------------------------------------------------------------------------------------------------|
| <b>Noel-Savina et. al.(53)</b>     | France             | 04/20 - 09/20     | 72  | 60.5 ± 12.8         | Hospitalized , ICU and non-ICU, COVID-19 pneumonia | 4     | Scintigraphy and CT        | Total Patients with Any Imaging Abnormality, GGO, Reticulations, Bronchiectasis, Dyspnea, PFTs      |
| <b>Núñez-Fernández et. al.(54)</b> | Spain              | 03/20 - 05/20     | 200 | 62 [50-71]          | Hospitalized , mixed severity                      | 3     | X-ray                      | Total Patients with Any Imaging Abnormality, PFTs                                                   |
| <b>Remy-Jardin et. al.(55)</b>     | France             | 03/20 - 04/20     | 55  | 59.7 ± 13.7         | Hospitalized                                       | 3     | Dual Energy CT Angiography | Total Patients with Any Imaging Abnormality, GGO, PFTs                                              |
| <b>Robey et. al.(56)</b>           | The United Kingdom | 03/20 - 06/20     | 72  | 58                  | Hospitalized , ICU and non-ICU                     | 4     | CT                         | Total Patients with Any Imaging Abnormality, GGO, Fibrosis                                          |
| <b>Skala et. al.(57)</b>           | Czech Republic     | 06/2020 - 10/2020 | 102 | 46.7                | Hospitalized and non-hospitalized                  | 3     | CT                         | Total Patients with Any Imaging Abnormality, GGO, Consolidations, Fibrosis, Bronchiectasis, Dyspnea |
| <b>Truffaut et. al.(59)</b>        | Belgium            | 03/20 - 06/20     | 22  | 54.6 ± 10.9         | Hospitalized , ARDS                                | 3     | CT                         | Total Patients with Any Imaging Abnormality, GGO, Consolidations, Fibrosis, PFTs                    |
| <b>van Gassel et. al.(60)</b>      | The Netherlands    | 03/20 - 05/20     | 46  | 63.00 [55.00-68.00] | Hospitalized , ICU                                 | 3     | CT                         | Total Patients with Any Imaging Abnormality, GGO, Reticulations, Fibrosis, PFTs                     |
| <b>Vijayakumar et. al.(61)</b>     | The United Kingdom | 03/20 - 06/20     | 73  | 59 ± 13             | Hospitalized                                       | 3, 12 | CT                         | Total Patients with Any Imaging Abnormality, GGO, Reticulations, Consolidations,                    |

|                          |       |               |     |                                                                                              |                                                                 |             |    |                                                                                                                                                                                    |
|--------------------------|-------|---------------|-----|----------------------------------------------------------------------------------------------|-----------------------------------------------------------------|-------------|----|------------------------------------------------------------------------------------------------------------------------------------------------------------------------------------|
| <b>Wu Q et. al.(62)</b>  | China | 01/20 - 09/20 | 48  | 47 [36-8-57-3]                                                                               | Hospitalized                                                    | 6           | CT | Fibrosis, Bronchiectasis, Dyspnea<br>Total Patients with Any Imaging Abnormality, GGO, Reticulations, Bronchiectasis, Dyspnea                                                      |
| <b>Wu X et. al.(63)</b>  | China | N/A           | 83  | 60 [52-66]                                                                                   | Hospitalized with mixed severity not requiring mech ventilation | 3, 6, 9, 12 | CT | Total Patients with Any Imaging Abnormality, GGO, Reticulations, Bronchiectasis, Dyspnea, PFTs                                                                                     |
| <b>Zhang et. al.(65)</b> | China | 01/20 - 03/20 | 40  | 57 [40-68]                                                                                   | Hospitalized                                                    | 8           | CT | Total Patients with Any Imaging Abnormality, GGO, Reticulations, Consolidations<br>Total Patients with Any Imaging Abnormality, GGO, Reticulations, Consolidations, Fibrosis, PFTs |
| <b>Zhao et. al.(8)</b>   | China | 01/21 - 02/21 | 94  | 48 ± 11-90                                                                                   | Hospitalized                                                    | 12          | CT | Total Patients with Any Imaging Abnormality, GGO, Reticulations, Consolidations, Fibrosis, PFTs                                                                                    |
| <b>Zhou et. al.(66)</b>  | China | 03/20 - 03/20 | 164 | Severe/Critical : 63-00 [56-00-69-00]<br>Mild/Moderate: 56-00 [47-50-63-00]<br>Asymptomatic: | Hospitalized and non-Hospitalized                               | 4           | CT | Total Patients with Any Imaging Abnormality, GGO, Reticulations, Fibrosis, Bronchiectasis                                                                                          |

46.00 [39.50-  
57.00]

Abbreviations: CT, computed tomography; GGOs, ground glass opacities; ICU, intensive care unit; PFTs, pulmonary function testing

**Table S2.** Summary of Meta-Regression between Imaging Abnormalities and Dyspnea Proportions, Sex, and Age

Abbreviations: CT, computed tomography; GGOs, ground glass opacities; NA, not available due to lack of studies. <sup>a</sup> Correlations for female are negative.

| Evaluated Factors                                   | Any Abnormality |         | Any Abnormality (CT only) |         | GGOs           |         | Reticulations  |         | Bronchiectasis |         | Consolidations |         | Fibrosis       |         |
|-----------------------------------------------------|-----------------|---------|---------------------------|---------|----------------|---------|----------------|---------|----------------|---------|----------------|---------|----------------|---------|
|                                                     | R <sup>2</sup>  | p-value | R <sup>2</sup>            | p-value | R <sup>2</sup> | p-value | R <sup>2</sup> | p-value | R <sup>2</sup> | p-value | R <sup>2</sup> | p-value | R <sup>2</sup> | p-value |
| <b>Cohort Proportion of Dyspnea</b>                 | 28 %            | 0.012   | 14 %                      | 0.10    | 0.0 %          | 0.47    | NA             | NA      | NA             | NA      | NA             | NA      | NA             | NA      |
| <b>Cohort Proportion of Females</b><br><sup>a</sup> | 3.8 %           | 0.11    | 6.3 %                     | 0.069   | 0.0 %          | 0.36    | 32 %           | 0.001   | 37 %           | 0.001   | 18 %           | 0.025   | 0.0 %          | 0.70    |
| <b>Cohort Mean Age</b>                              | 24 %            | 0.002   | 30 %                      | 0.001   | 21 %           | 0.004   | 38 %           | 0.001   | 14 %           | 0.081   | 0.0%           | 0.55    | 15 %           | 0.051   |

**Table S3.** Summary of Meta-Regression of Pulmonary Function Testing

| <b>Pulmonary Function</b> | <b>Patients Evaluated at Each Time Point, N</b> | <b>Raw Mean, All Timepoints (95% CI)</b> | <b>Raw Mean Early Follow-up (95% CI)</b> | <b>Raw Mean F/U**, (95% CI)</b> | <b>Change from early to late follow-up, p-value<sup>†</sup></b> | <b>Heterogeneity attributable to follow-up time<sup>‡</sup></b> |
|---------------------------|-------------------------------------------------|------------------------------------------|------------------------------------------|---------------------------------|-----------------------------------------------------------------|-----------------------------------------------------------------|
| FEV1/FVC (percent)        | 1532 (total), 700 (early F/U), 832 (late F/U)   | 85.4 (79.2-91.6)                         | 85.4 (78.8-92.0)                         | 86.5 (80.8-92.2)                | 0.80                                                            | 0.00 %                                                          |
| FEV1 (percent predicted)  | 2019 (total), 1049 (early F/U), 970 (late F/U)  | 91.4 (88.2-94.6)                         | 91.4 (87.5-95.3)                         | 96.2 (94.2-98.3)                | 0.024                                                           | 14 %                                                            |
| FVC (percent predicted)   | 2035 (total), 919 (early F/U), 1116 (late F/U)  | 92.5 (88.0-97.0)                         | 92.5 (87.5-97.5)                         | 96.1 (92.5-100.0)               | 0.24                                                            | 0.53 %                                                          |
| DLCO (percent predicted)  | 2099 (total), 1025 (early F/U), 1075 (late F/U) | 76.1 (71.1-81.2)                         | 76.1 (70.8-81.5)                         | 84.7 (80.0-89.5)                | 0.034                                                           | 18 %                                                            |

Abbreviations: FEV1, Forced Expiratory Volume in the first second; FVC, Forced Vital Capacity; DLCO, Diffusing Capacity for Carbon Monoxide;

F/U, follow-up; CI, confidence interval. \*3 months since acute infection. \*\*>3 months since acute infection. †p-value from random effects model.

‡R<sup>2</sup> from random effects model.

**Table S4.** Total and specific chest imaging abnormalities during follow-up after stepwise removal of heterogeneity

| <b>Abnormality</b>                    | <b>Studies Included/Total studies</b>              | <b>Overall prevalence of imaging abnormalities (95% CI)</b> | <b>At early F/U*, prevalence (95% CI)</b> | <b>At late F/U**, prevalence (95% CI)</b> | <b>Change from early to late follow-up, p-value<sup>†</sup></b> | <b>Heterogeneity attributable to follow-up time<sup>‡</sup></b> |
|---------------------------------------|----------------------------------------------------|-------------------------------------------------------------|-------------------------------------------|-------------------------------------------|-----------------------------------------------------------------|-----------------------------------------------------------------|
| Any abnormality                       | 20/38 (total), 7/18 (early F/U), 13/20 (late F/U)  | 65.8 [62.9-68.7]                                            | 62.5 [57.3-67.7]                          | 57.4% (64.3-70.6%)                        | 0.098                                                           | 53 %                                                            |
| Any abnormality (CT imaging subgroup) | 19/34 (total), 7/16 (early F/U), 12/18 (late F/U)  | 65.8% (62.6-69.0%)                                          | 62.5% (57.3-67.7%)                        | 67.6% (63.9-71.3%)                        | 0.12                                                            | 28 %                                                            |
| GGOs                                  | 23/37 (total), 10/18 (early F/U), 13/19 (late F/U) | 51.6% (46.6-56.7%)                                          | 62.6% (57.9-67.4%)                        | 43.2% (40.4-46.1%)                        | >0.0001                                                         | 93 %                                                            |
| Reticulations                         | 11/22 (total), 3/7 (early F/U), 8/15 (late F/U)    | 14.2% (7.48-20.9%)                                          | 29.3% (23.9-34.7%)                        | 7.83% (3.75-11.9%)                        | >0.0001                                                         | 100 %                                                           |
| Bronchiectasises                      | 9/19 (total), 4/7 (early F/U), 5/12 (late F/U)     | 19.6% (12.6-26.5%)                                          | 9.68% (4.99-14.4%)                        | 27.3% (22.2-32.5%)                        | >0.0001                                                         | 89 %                                                            |
| Consolidations                        | 15/22 (total), 7/10 (early F/U), 8/12 (late F/U)   | 5.75% (3.03-8.47%)                                          | 9.34% (4.84-13.8%)                        | 3.67% (0.02-7.09%)                        | 0.049                                                           | 0.0 %                                                           |
| Fibrosis                              | 8/21 (total), 4/11 (early F/U), 4/10 (late F/U)    | 13.1% (7.41-18.7%)                                          | 6.60% (1.77-11.44%)                       | 19.8% (14.5-25.0%)                        | 0.0003                                                          | 100 %                                                           |

Abbreviations: CT, computed tomography; GGOs, ground glass opacities; F/U, follow-up; CI, confidence interval. \*3 months since acute infection. \*\*>3 months since acute infection. †p-value from random effects model. ‡I<sup>2</sup> from random effects model.

**Table S5.** Summary of Meta-Regression between Imaging Abnormalities and Dyspnea Proportions, Sex, and Age after stepwise removal of heterogeneity

| Evaluated Factors                               | Any Abnormality |         | Any Abnormality (CT only) |         | GGOs           |         | Reticulations  |         | Bronchiectasis |         | Consolidations |         | Fibrosis       |         |
|-------------------------------------------------|-----------------|---------|---------------------------|---------|----------------|---------|----------------|---------|----------------|---------|----------------|---------|----------------|---------|
|                                                 | R <sup>2</sup>  | p-value | R <sup>2</sup>            | p-value | R <sup>2</sup> | p-value | R <sup>2</sup> | p-value | R <sup>2</sup> | p-value | R <sup>2</sup> | p-value | R <sup>2</sup> | p-value |
| <b>Cohort Proportion of Dyspnea</b>             | 97 %            | <0.0001 | 95 %                      | <0.0001 | 100 %          | <0.0001 | NA             | NA      | NA             | NA      | NA             | NA      | NA             | NA      |
| <b>Cohort Proportion of Females<sup>a</sup></b> | 95 %            | <0.0001 | 92 %                      | <0.0001 | 92 %           | <0.0001 | 89 %           | <0.0001 | 78 %           | <0.0001 | 96 %           | <0.0001 | 97 %           | <0.0001 |
| <b>Cohort Mean Age</b>                          | 98 %            | <0.0001 | 100 %                     | <0.0001 | 93 %           | <0.0001 | 97 %           | <0.0001 | 87 %           | <0.0001 | 87 %           | <0.0001 | 78 %           | <0.0001 |

Abbreviations: CT, computed tomography; GGOs, ground glass opacities; NA, not available due to lack of studies. <sup>a</sup> Correlations for female are negative.

| Author                 | Title                                                                                                                                                                                              | 1. Was selection of external and non-external cohorts drawn from the same population? | 2. Can we be confident in the assessment of outcomes? | 3. Can we be confident in the assessment of outcomes? | 4. Did study results in the outcomes of interest differ in the subgroups of interest? | 5. Can we be confident in the assessment of outcomes? | 6. Can we be confident in the assessment of outcomes? | 7. Were the follow-up & cohorts undertaken? | 8. Were the follow-up & cohorts undertaken? |
|------------------------|----------------------------------------------------------------------------------------------------------------------------------------------------------------------------------------------------|---------------------------------------------------------------------------------------|-------------------------------------------------------|-------------------------------------------------------|---------------------------------------------------------------------------------------|-------------------------------------------------------|-------------------------------------------------------|---------------------------------------------|---------------------------------------------|
| Ibbil et al.           | Post-discharge chest CT findings and pulmonary function tests in severe COVID-19 patients                                                                                                          | Green                                                                                 | Green                                                 | Green                                                 | Green                                                                                 | Green                                                 | Green                                                 | Green                                       | Green                                       |
| Bardaki et al.         | Evaluation of long term radiological findings, pulmonary functions, and health-related quality of life in survivors of severe COVID-19                                                             | Green                                                                                 | Green                                                 | Green                                                 | Green                                                                                 | Green                                                 | Green                                                 | Green                                       | Green                                       |
| Cao et al.             | Three-month outcomes of recovered COVID-19 patients: prospective observational study.                                                                                                              | Green                                                                                 | Green                                                 | Green                                                 | Green                                                                                 | Green                                                 | Green                                                 | Green                                       | Green                                       |
| Caruso et al.          | Post-Acute Sequelae of COVID-19 Pneumonia: Six-month Chest CT Follow-up                                                                                                                            | Green                                                                                 | Green                                                 | Green                                                 | Green                                                                                 | Green                                                 | Green                                                 | Green                                       | Green                                       |
| Chen et al.            | One-year follow-up of chest CT findings in patients after SARS-CoV-2 infection                                                                                                                     | Green                                                                                 | Green                                                 | Green                                                 | Green                                                                                 | Green                                                 | Green                                                 | Green                                       | Green                                       |
| Dai et al.             | Follow-Up Study of the Cardiopulmonary and Psychological Outcomes of COVID-19 Survivors Six Months After Discharge in Sichuan, China                                                               | Green                                                                                 | Green                                                 | Green                                                 | Green                                                                                 | Green                                                 | Green                                                 | Green                                       | Green                                       |
| Fortini et al.         | COVID-19: persistence of symptoms and lung alterations after 3-6 months from hospital discharge                                                                                                    | Green                                                                                 | Green                                                 | Green                                                 | Green                                                                                 | Green                                                 | Green                                                 | Green                                       | Green                                       |
| Frija-Masson et al.    | Residual ground glass opacities three months after COVID-19 pneumonia correlate to alteration of respiratory function: The post Covid M3 study                                                     | Green                                                                                 | Green                                                 | Green                                                 | Green                                                                                 | Green                                                 | Green                                                 | Green                                       | Green                                       |
| Froidure et al.        | Integrative respiratory follow-up of severe COVID-19 reveals common functional and lung imaging sequelae                                                                                           | Green                                                                                 | Green                                                 | Green                                                 | Green                                                                                 | Green                                                 | Green                                                 | Green                                       | Green                                       |
| Gamberini et al.       | Health-related quality of life profiles, trajectories, persistent symptoms and pulmonary function one year after ICU discharge in invasively ventilated COVID-19 patients: a prospective follow-up | Green                                                                                 | Green                                                 | Green                                                 | Green                                                                                 | Green                                                 | Green                                                 | Green                                       | Green                                       |
| Gianella et al.        | One-year follow-up of chest CT findings in patients after SARS-CoV-2 infection                                                                                                                     | Green                                                                                 | Green                                                 | Green                                                 | Green                                                                                 | Green                                                 | Green                                                 | Green                                       | Green                                       |
| Gonzalez et al.        | Pulmonary Function and Radiologic Features in Survivors of Critical COVID-19: A 3-Month Prospective Cohort                                                                                         | Green                                                                                 | Green                                                 | Green                                                 | Green                                                                                 | Green                                                 | Green                                                 | Green                                       | Green                                       |
| Grist et al.           | Hyperpolarized 129Xe MRI Abnormalities in Dyspnoic Patients 3 Months after COVID-19 Pneumonia: Preliminary Results                                                                                 | Green                                                                                 | Green                                                 | Green                                                 | Green                                                                                 | Green                                                 | Green                                                 | Green                                       | Green                                       |
| Guler et al.           | Pulmonary function and radiological features 4 months after COVID-19: first results from the national prospective observational Swiss COVID-19 lung study                                          | Green                                                                                 | Green                                                 | Green                                                 | Green                                                                                 | Green                                                 | Green                                                 | Green                                       | Green                                       |
| Gurbani et al.         | Clinical outcomes and lung ultrasound finding in COVID-19 follow up: Can calm come after this storm?                                                                                               | Green                                                                                 | Green                                                 | Green                                                 | Green                                                                                 | Green                                                 | Green                                                 | Green                                       | Green                                       |
| Hellemons et al.       | Persistent Health Problems beyond Pulmonary Recovery up to 6 Months after Hospitalization for SARS-CoV-2: A Longitudinal Study of Respiratory, Physical and Psychological Outcomes                 | Green                                                                                 | Green                                                 | Green                                                 | Green                                                                                 | Green                                                 | Green                                                 | Green                                       | Green                                       |
| Holdsworth et al.      | Comprehensive clinical assessment identifies specific neurocognitive deficits in working-age patients with long-COVID                                                                              | Green                                                                                 | Green                                                 | Green                                                 | Green                                                                                 | Green                                                 | Green                                                 | Green                                       | Green                                       |
| Hu et al.              | Clinical Features and Temporal Lung Radiographic Changes in 35 Patients Recovering from COVID-19 Pneumonia: A Retrospective Case-Control Study                                                     | Green                                                                                 | Green                                                 | Green                                                 | Green                                                                                 | Green                                                 | Green                                                 | Green                                       | Green                                       |
| Huang et al.           | 6-month consequences of COVID-19 in patients discharged from hospital: a cohort study                                                                                                              | Green                                                                                 | Green                                                 | Green                                                 | Green                                                                                 | Green                                                 | Green                                                 | Green                                       | Green                                       |
| Johansen et al.        | Descriptive analysis of long COVID sequelae identified in a multidisciplinary clinic serving hospitalised and non-hospitalised patients                                                            | Green                                                                                 | Green                                                 | Green                                                 | Green                                                                                 | Green                                                 | Green                                                 | Green                                       | Green                                       |
| Jutant et al.          | Respiratory symptoms and radiological findings in post-acute COVID-19 syndrome                                                                                                                     | Green                                                                                 | Green                                                 | Green                                                 | Green                                                                                 | Green                                                 | Green                                                 | Green                                       | Green                                       |
| Labarca et al.         | Analysis of clinical symptoms, radiological changes and pulmonary function data 4 months after COVID-19                                                                                            | Green                                                                                 | Green                                                 | Green                                                 | Green                                                                                 | Green                                                 | Green                                                 | Green                                       | Green                                       |
| Lerum et al.           | Dyspnoea, lung function and CT findings 3 months after hospital admission for COVID-19                                                                                                             | Green                                                                                 | Green                                                 | Green                                                 | Green                                                                                 | Green                                                 | Green                                                 | Green                                       | Green                                       |
| Li et al.              | Pulmonary fibrosis and its related factors in discharged patients with new corona virus pneumonia: a cohort study                                                                                  | Green                                                                                 | Green                                                 | Green                                                 | Green                                                                                 | Green                                                 | Green                                                 | Green                                       | Green                                       |
| Liao et al.            | Long-Term Effects of COVID-19 on Health Care Workers 1-Year Post-Discharge in Wuhan                                                                                                                | Green                                                                                 | Green                                                 | Green                                                 | Green                                                                                 | Green                                                 | Green                                                 | Green                                       | Green                                       |
| Liu et al.             | Follow-Up Study of the Chest CT Characteristics of COVID-19 Survivors Seven Months After Recovery                                                                                                  | Green                                                                                 | Green                                                 | Green                                                 | Green                                                                                 | Green                                                 | Green                                                 | Green                                       | Green                                       |
| Luger et al.           | Chest CT of Lung Injury 1 Year after COVID-19 Pneumonia: The CovidLD Study                                                                                                                         | Green                                                                                 | Green                                                 | Green                                                 | Green                                                                                 | Green                                                 | Green                                                 | Green                                       | Green                                       |
| Martino et al.         | 6 and 12 month outcomes in patients following COVID-19-related hospitalization: a prospective monocentric study                                                                                    | Green                                                                                 | Green                                                 | Green                                                 | Green                                                                                 | Green                                                 | Green                                                 | Green                                       | Green                                       |
| McGroder et al.        | Pulmonary fibrosis 4 months after COVID-19 is associated with severity of illness and blood leucocyte telomere length                                                                              | Green                                                                                 | Green                                                 | Green                                                 | Green                                                                                 | Green                                                 | Green                                                 | Green                                       | Green                                       |
| Mwara et al.           | Abnormal pulmonary function and imaging studies in critical COVID-19 survivors at 300 days after the onset of symptoms                                                                             | Green                                                                                 | Green                                                 | Green                                                 | Green                                                                                 | Green                                                 | Green                                                 | Green                                       | Green                                       |
| Mohr et al.            | Cardiopulmonary exercise pattern in patients with persistent dyspnoea after recovery from COVID-19                                                                                                 | Green                                                                                 | Green                                                 | Green                                                 | Green                                                                                 | Green                                                 | Green                                                 | Green                                       | Green                                       |
| Muhammad et al.        | Analysis of predictive factors of post-covid-19 associated pulmonary fibrosis: a longitudinal study                                                                                                | Green                                                                                 | Green                                                 | Green                                                 | Green                                                                                 | Green                                                 | Green                                                 | Green                                       | Green                                       |
| Mumoli et al.          | Lung Function and Symptoms in Post-COVID-19 Patients                                                                                                                                               | Green                                                                                 | Green                                                 | Green                                                 | Green                                                                                 | Green                                                 | Green                                                 | Green                                       | Green                                       |
| Nabahati et al.        | Post-COVID-19 pulmonary fibrosis and its predictive factors: a prospective study                                                                                                                   | Green                                                                                 | Green                                                 | Green                                                 | Green                                                                                 | Green                                                 | Green                                                 | Green                                       | Green                                       |
| Noel-Savina et al.     | Severe SARS-CoV-2 pneumonia: Clinical, functional and imaging outcomes at 4 months                                                                                                                 | Green                                                                                 | Green                                                 | Green                                                 | Green                                                                                 | Green                                                 | Green                                                 | Green                                       | Green                                       |
| Núñez-Fernández et al. | Alterations in Respiratory Function Test Three Months after Hospitalization for COVID-19 Pneumonia: Value of Determining Nitric Oxide Diffusion                                                    | Green                                                                                 | Green                                                 | Green                                                 | Green                                                                                 | Green                                                 | Green                                                 | Green                                       | Green                                       |
| Remy-Jardin et al.     | Assessment of pulmonary arterial circulation 3 months after hospitalization for SARS-CoV-2 pneumonia: Dual-energy CT (DECT) angiographic study in 55 patients                                      | Green                                                                                 | Green                                                 | Green                                                 | Green                                                                                 | Green                                                 | Green                                                 | Green                                       | Green                                       |
| Robey et al.           | Pulmonary Sequelae at 4 Months After COVID-19 Infection: A Single-Centre Experience of a COVID Follow-Up Service                                                                                   | Green                                                                                 | Green                                                 | Green                                                 | Green                                                                                 | Green                                                 | Green                                                 | Green                                       | Green                                       |
| Skala et al.           | Heterogeneity of post-COVID impairment: interim analysis of a prospective study from Czechia                                                                                                       | Green                                                                                 | Green                                                 | Green                                                 | Green                                                                                 | Green                                                 | Green                                                 | Green                                       | Green                                       |
| Truffaut et al.        | Post-discharge critical COVID-19 lung function related to severity of radiologic lung involvement at admission                                                                                     | Green                                                                                 | Green                                                 | Green                                                 | Green                                                                                 | Green                                                 | Green                                                 | Green                                       | Green                                       |
| van Gassel et al.      | High Prevalence of Pulmonary Sequelae at 3 Months after Hospital Discharge in Mechanically Ventilated Survivors of COVID-19                                                                        | Green                                                                                 | Green                                                 | Green                                                 | Green                                                                                 | Green                                                 | Green                                                 | Green                                       | Green                                       |
| Vijayakumar et al.     | CT Lung Abnormalities after COVID-19 at 3 Months and 1 Year after Hospital Discharge                                                                                                               | Green                                                                                 | Green                                                 | Green                                                 | Green                                                                                 | Green                                                 | Green                                                 | Green                                       | Green                                       |
| Wu Q. et al.           | A Follow-Up Study of Lung Function and Chest Computed Tomography at 6 Months after Discharge in Patients with Coronavirus Disease 2019                                                             | Green                                                                                 | Green                                                 | Green                                                 | Green                                                                                 | Green                                                 | Green                                                 | Green                                       | Green                                       |
| Wu X. et al.           | 3-month, 6-month, 9-month, and 12-month respiratory outcomes in patients following COVID-19-related hospitalisation: a prospective study                                                           | Green                                                                                 | Green                                                 | Green                                                 | Green                                                                                 | Green                                                 | Green                                                 | Green                                       | Green                                       |
| Zhang et al.           | Eight months follow-up study on pulmonary function, lung radiographic, and related physiological characteristics in COVID-19 survivors                                                             | Green                                                                                 | Green                                                 | Green                                                 | Green                                                                                 | Green                                                 | Green                                                 | Green                                       | Green                                       |
| Zhao et al.            | Follow-up study on COVID-19 survivors one year after discharge from hospital                                                                                                                       | Green                                                                                 | Green                                                 | Green                                                 | Green                                                                                 | Green                                                 | Green                                                 | Green                                       | Green                                       |
| Zhou et al.            | Comparison of Residual Pulmonary Abnormalities 3 Months After Discharge in Patients Who Recovered From COVID-19 of Different Severity                                                              | Green                                                                                 | Green                                                 | Green                                                 | Green                                                                                 | Green                                                 | Green                                                 | Green                                       | Green                                       |

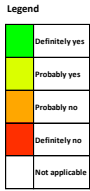

Figure S1 Clarity Bias Assessment



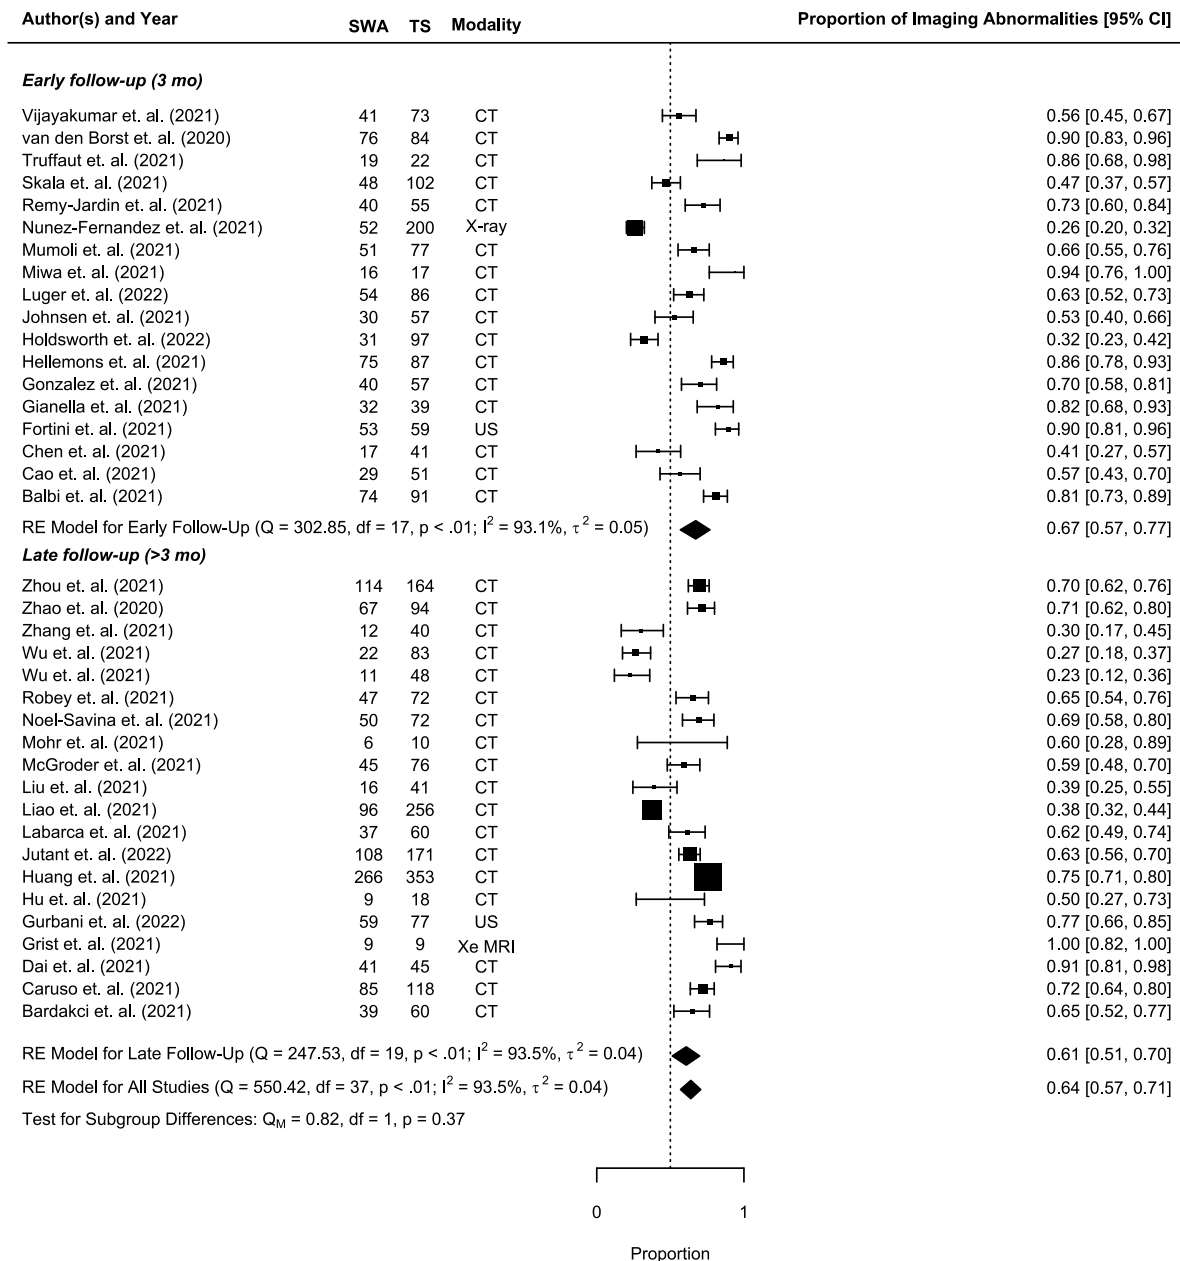

**Figure S2: Forest Plot Proportion of Any Imaging Abnormality at Any, Early, and Late Follow-up.**

Abbreviations: SWA, subjects with abnormality; TS, total subjects; RE, random effects

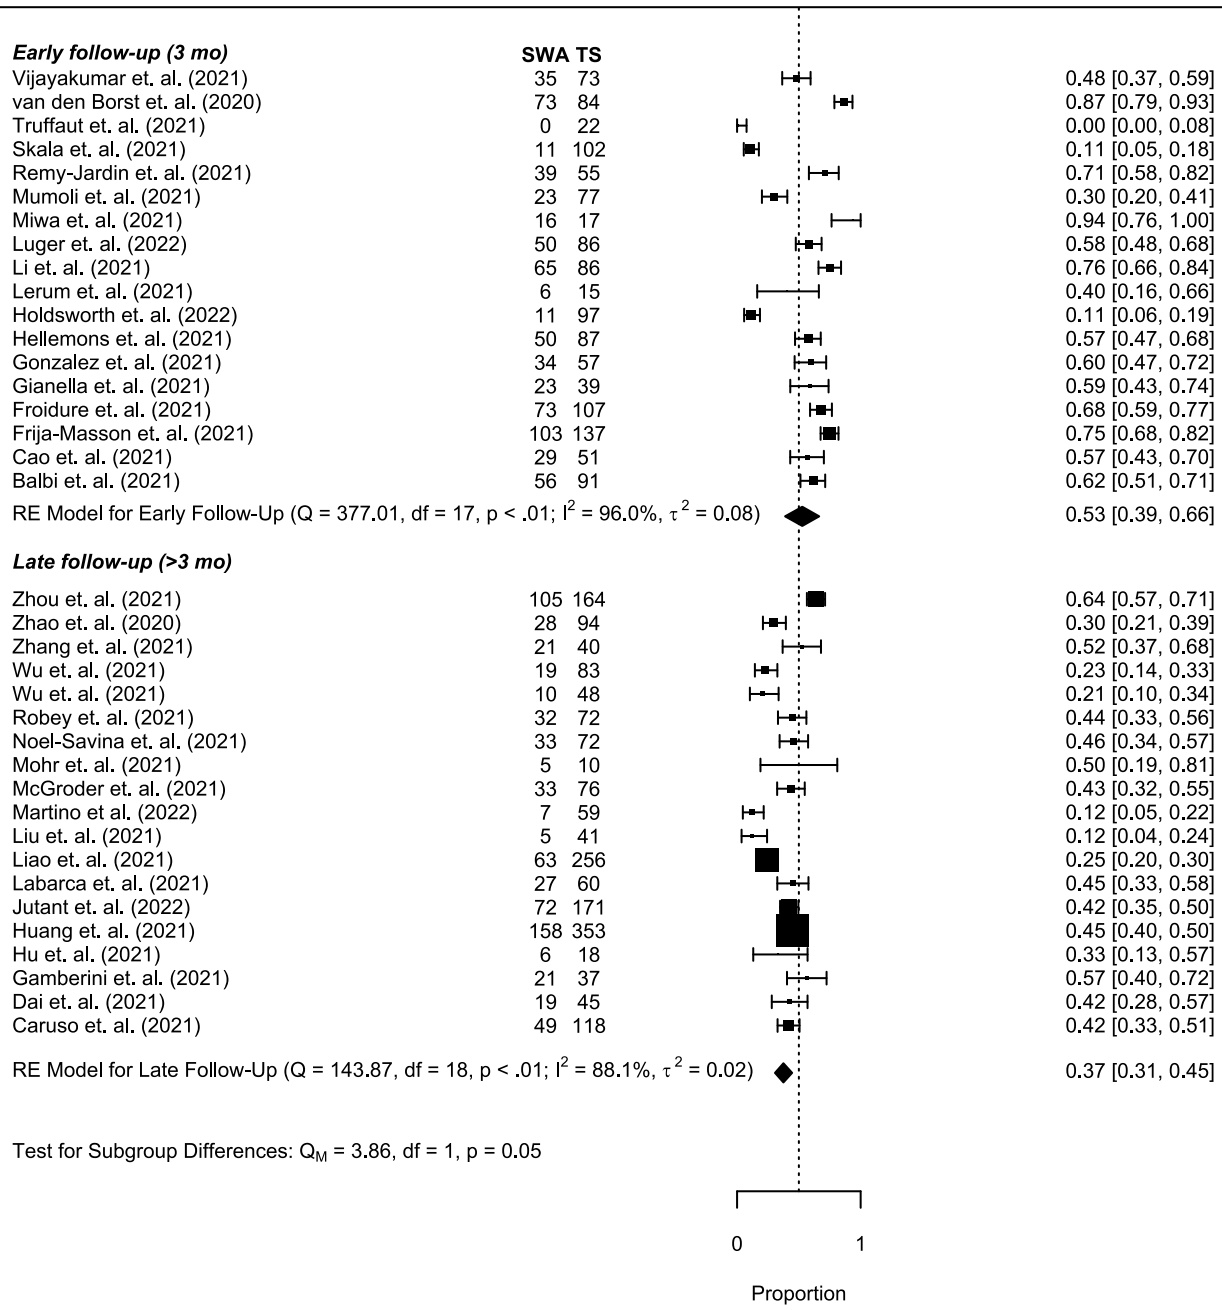

**Figure S3: Forest Plot Proportion of GGOs at Any, Early, and Late Follow-up.** Abbreviations: SWA, subjects with abnormality; TS, total subjects; RE, random effects

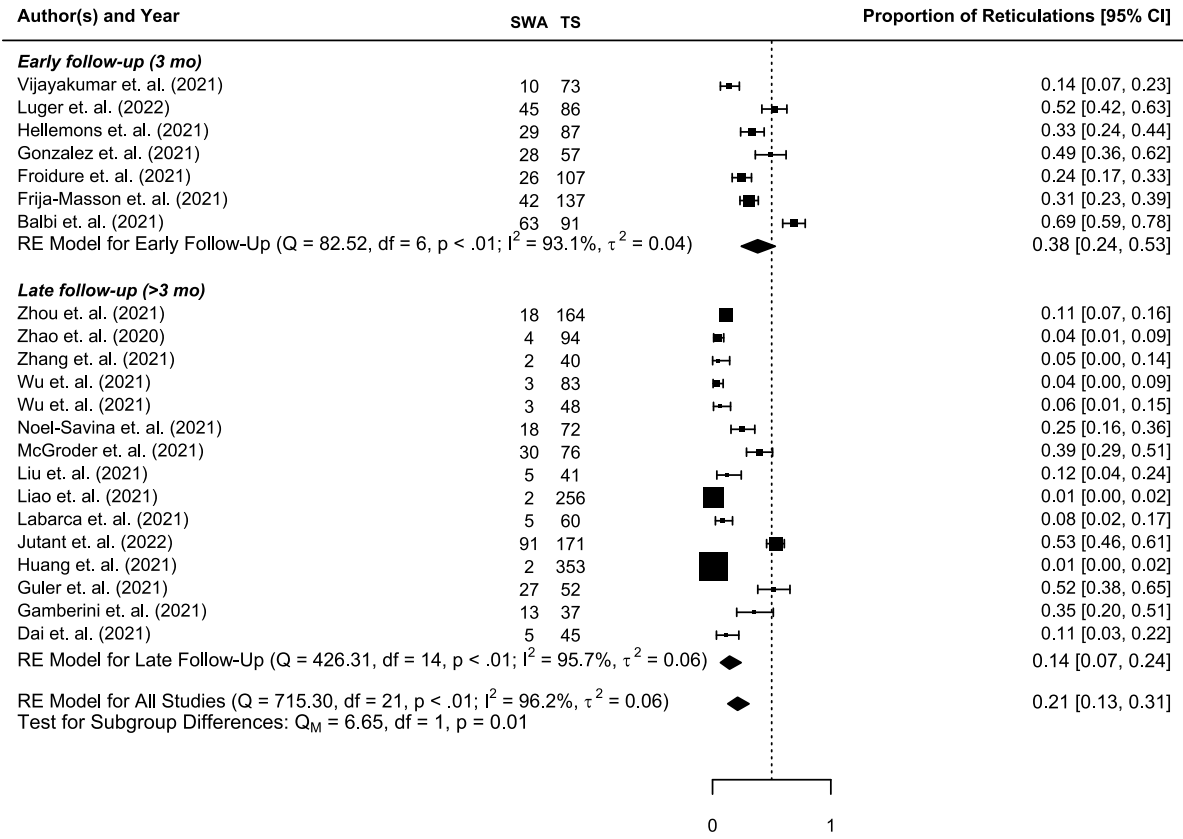

**Figure S4: Forest Plot Proportion of Reticulations at Any, Early, and Late Follow-up.** Abbreviations:

SWA, subjects with abnormality; TS, total subjects; RE, random effects

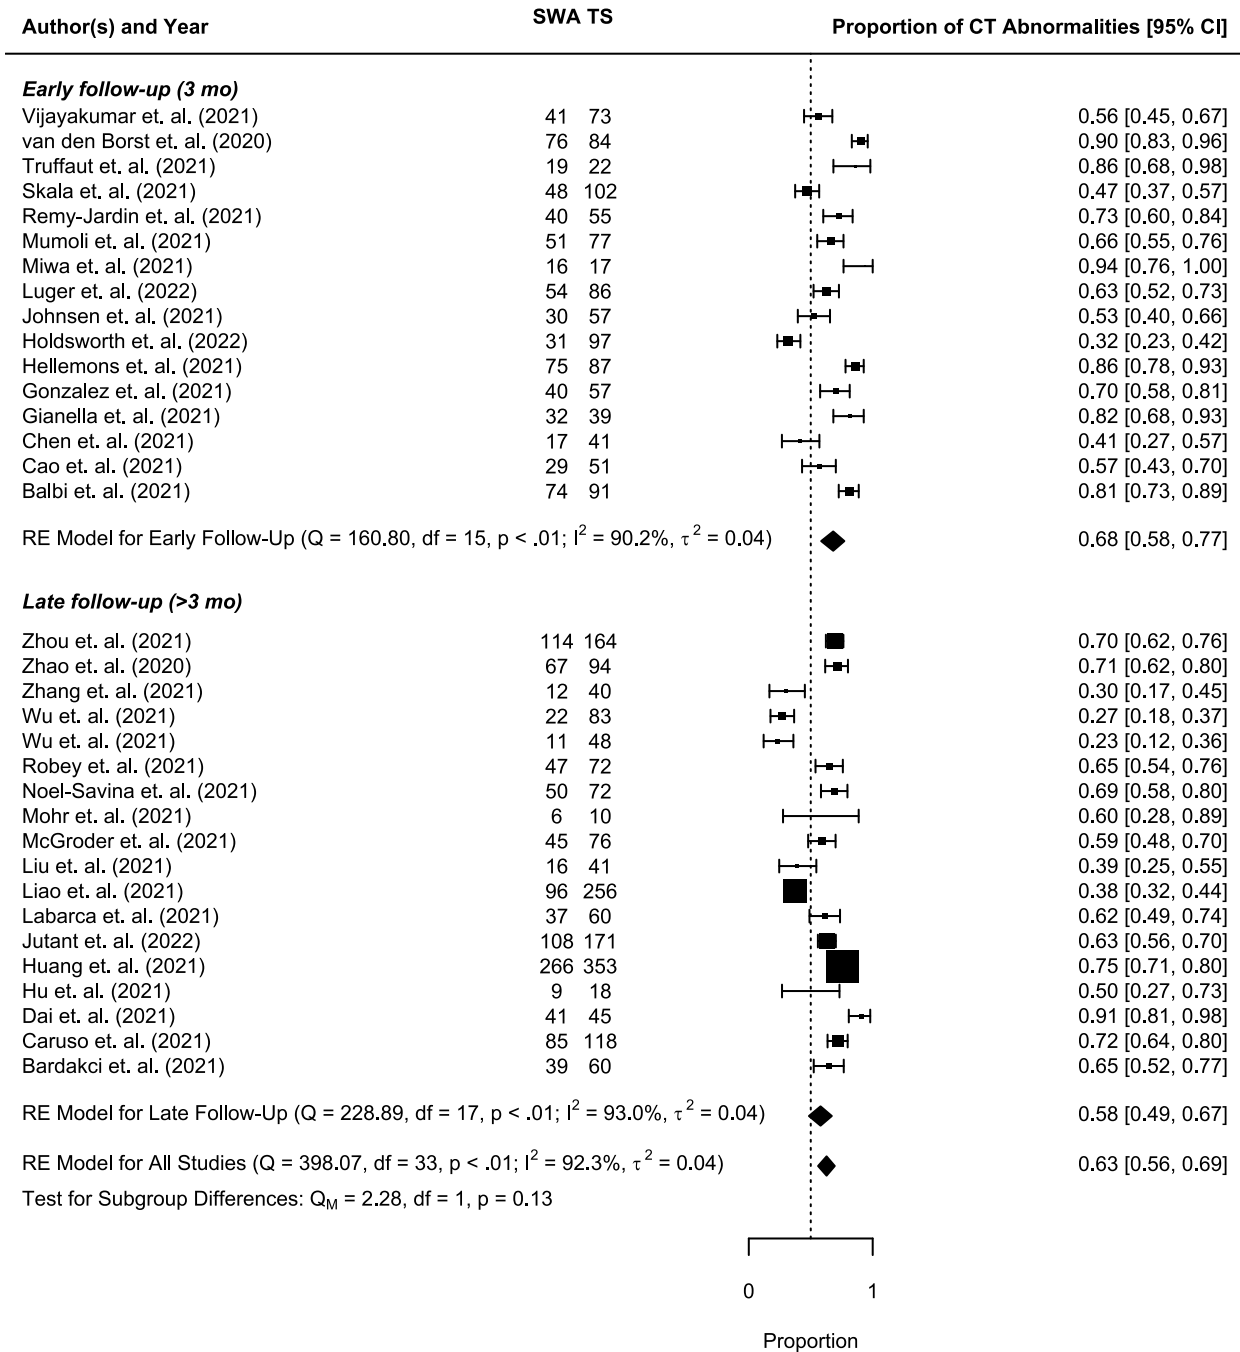

**Figure S5 Forest Plot Proportion of CT-only Abnormalities at Any, Early, and Late Follow-up**

Abbreviations: SWA, subjects with abnormality; TS, total subjects; RE, random effects

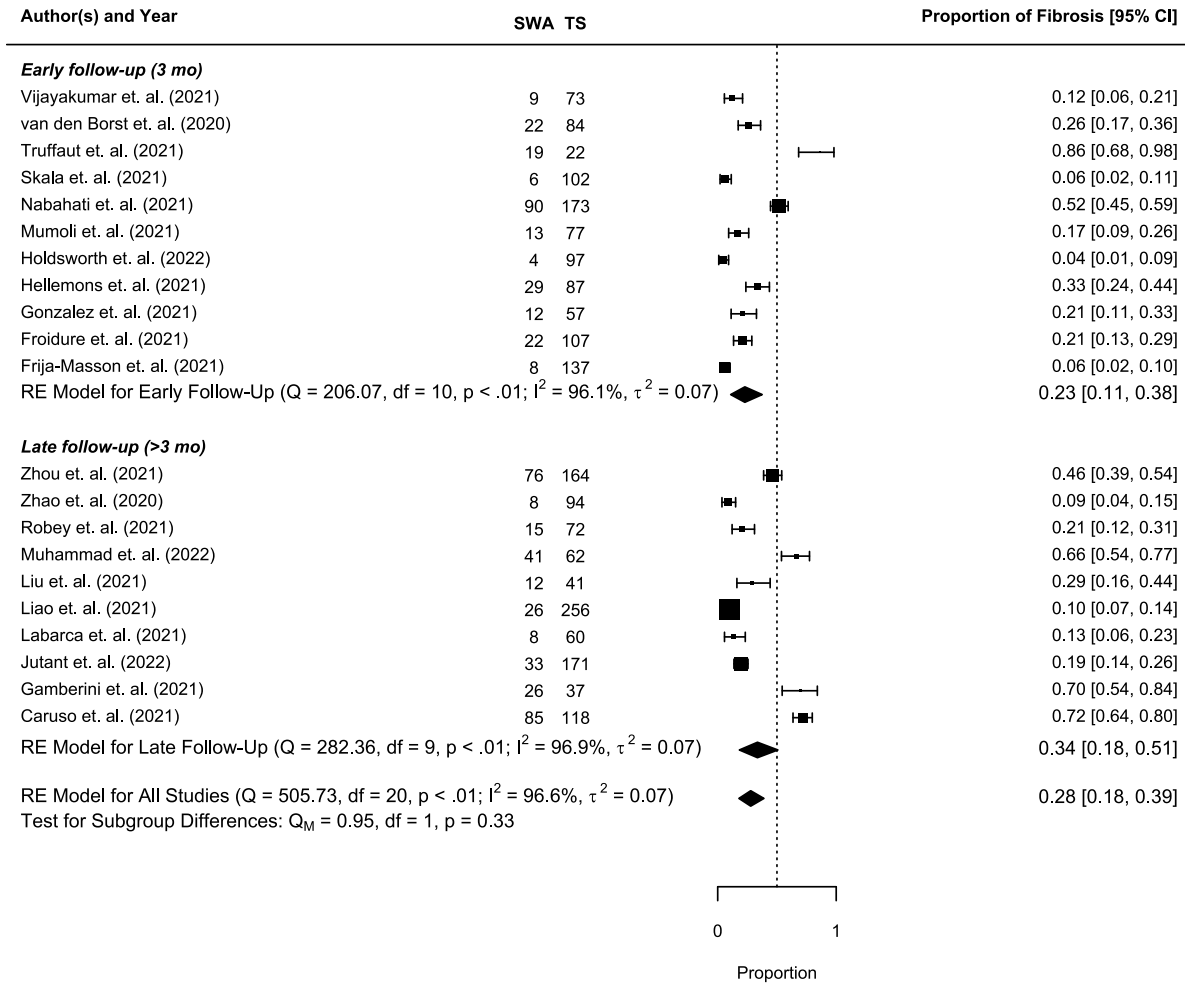

**Figure S6 Forest Plot Proportion of Fibrosis at Any, Early, and Late Follow-up**

Abbreviations: SWA, subjects with abnormality; TS, total subjects; RE, random effects

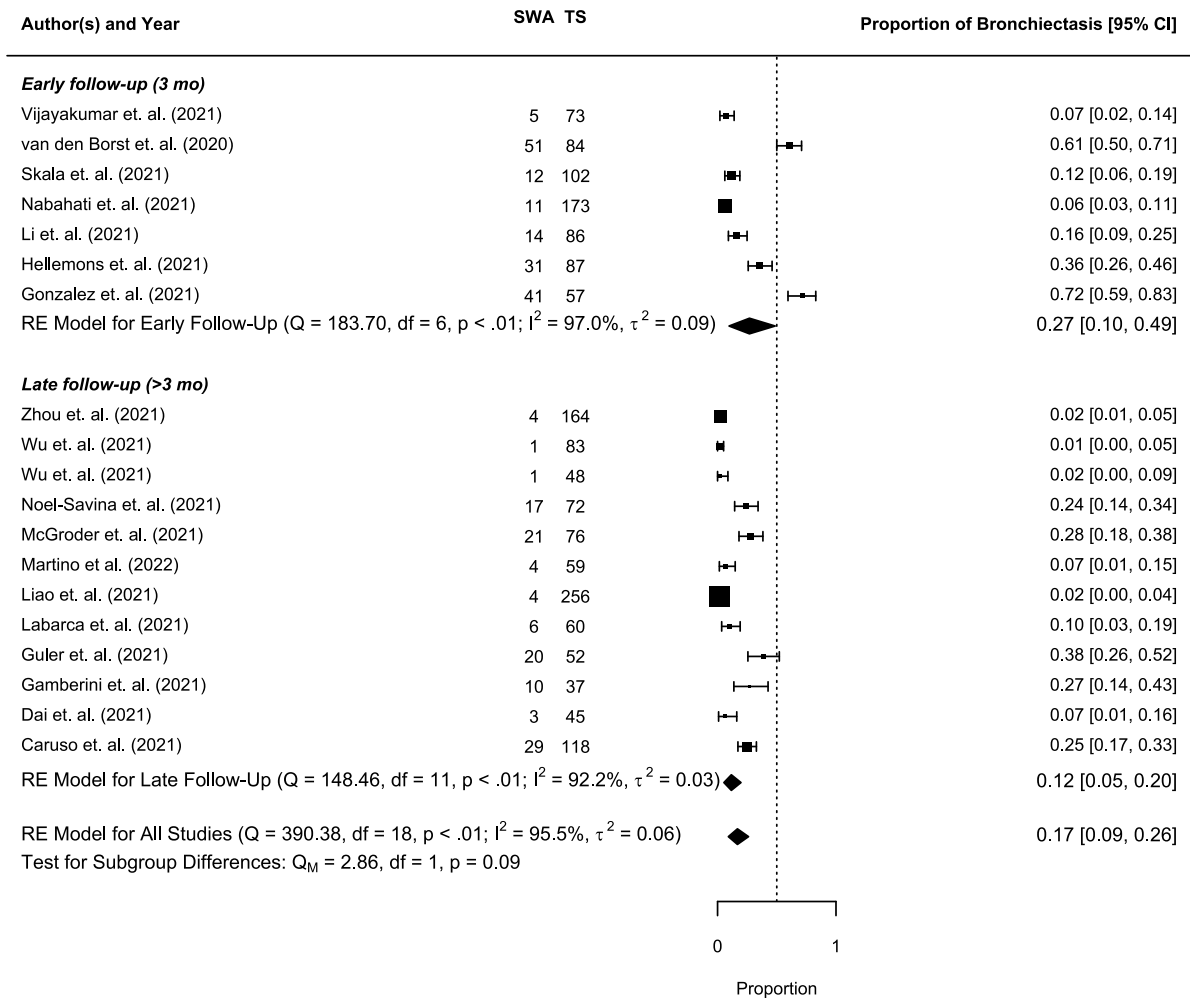

**Figure S7 Forest Plot Proportion of Bronchiectasis at Any, Early, and Late Follow-up Abbreviations:**  
 SWA, subjects with abnormality; TS, total subjects; RE, random effects

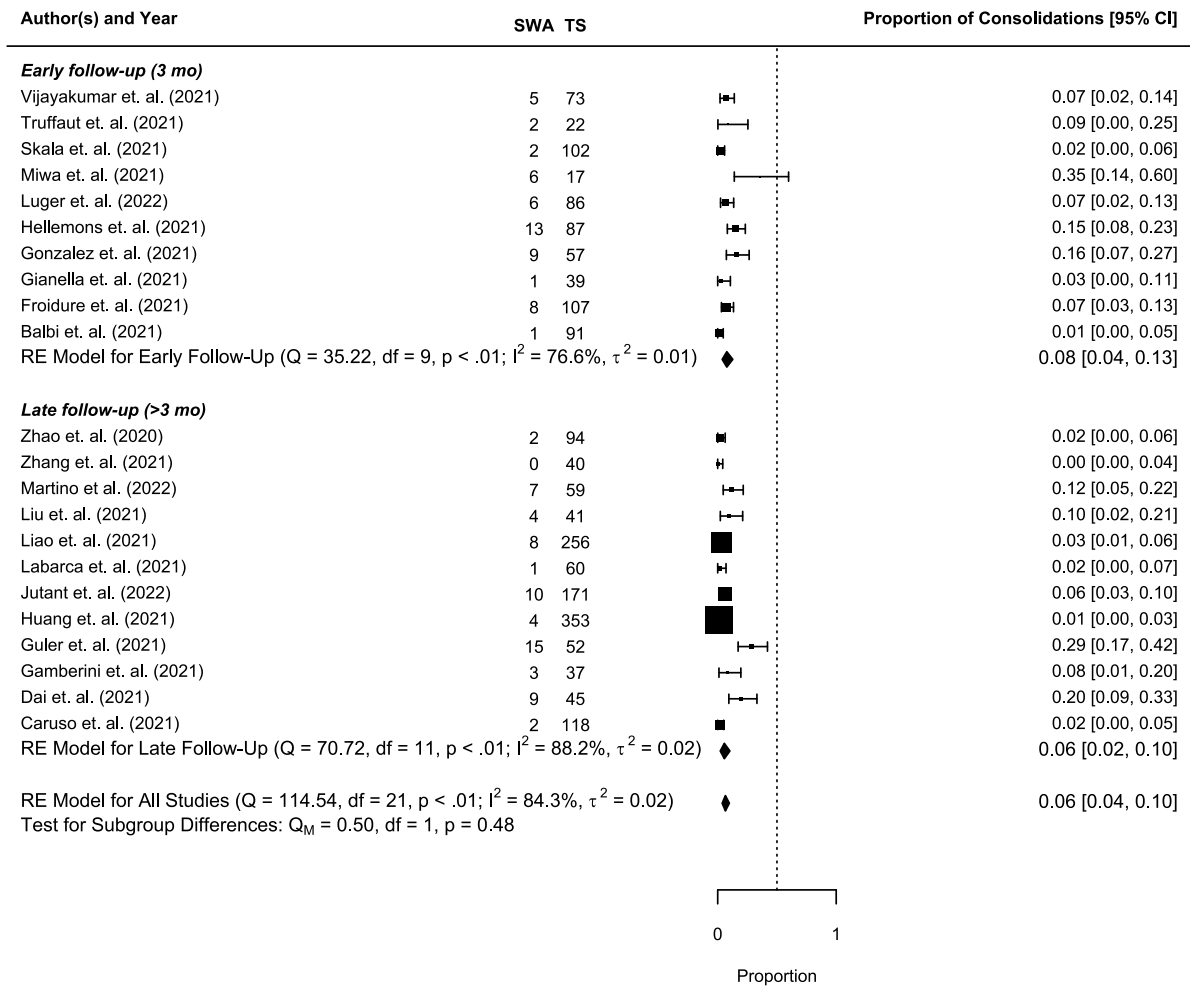

**Figure S8 Forest Plot Proportion of Consolidations at Any, Early, and Late Follow-up** Abbreviations:

SWA, subjects with abnormality; TS, total subjects; RE, random effects

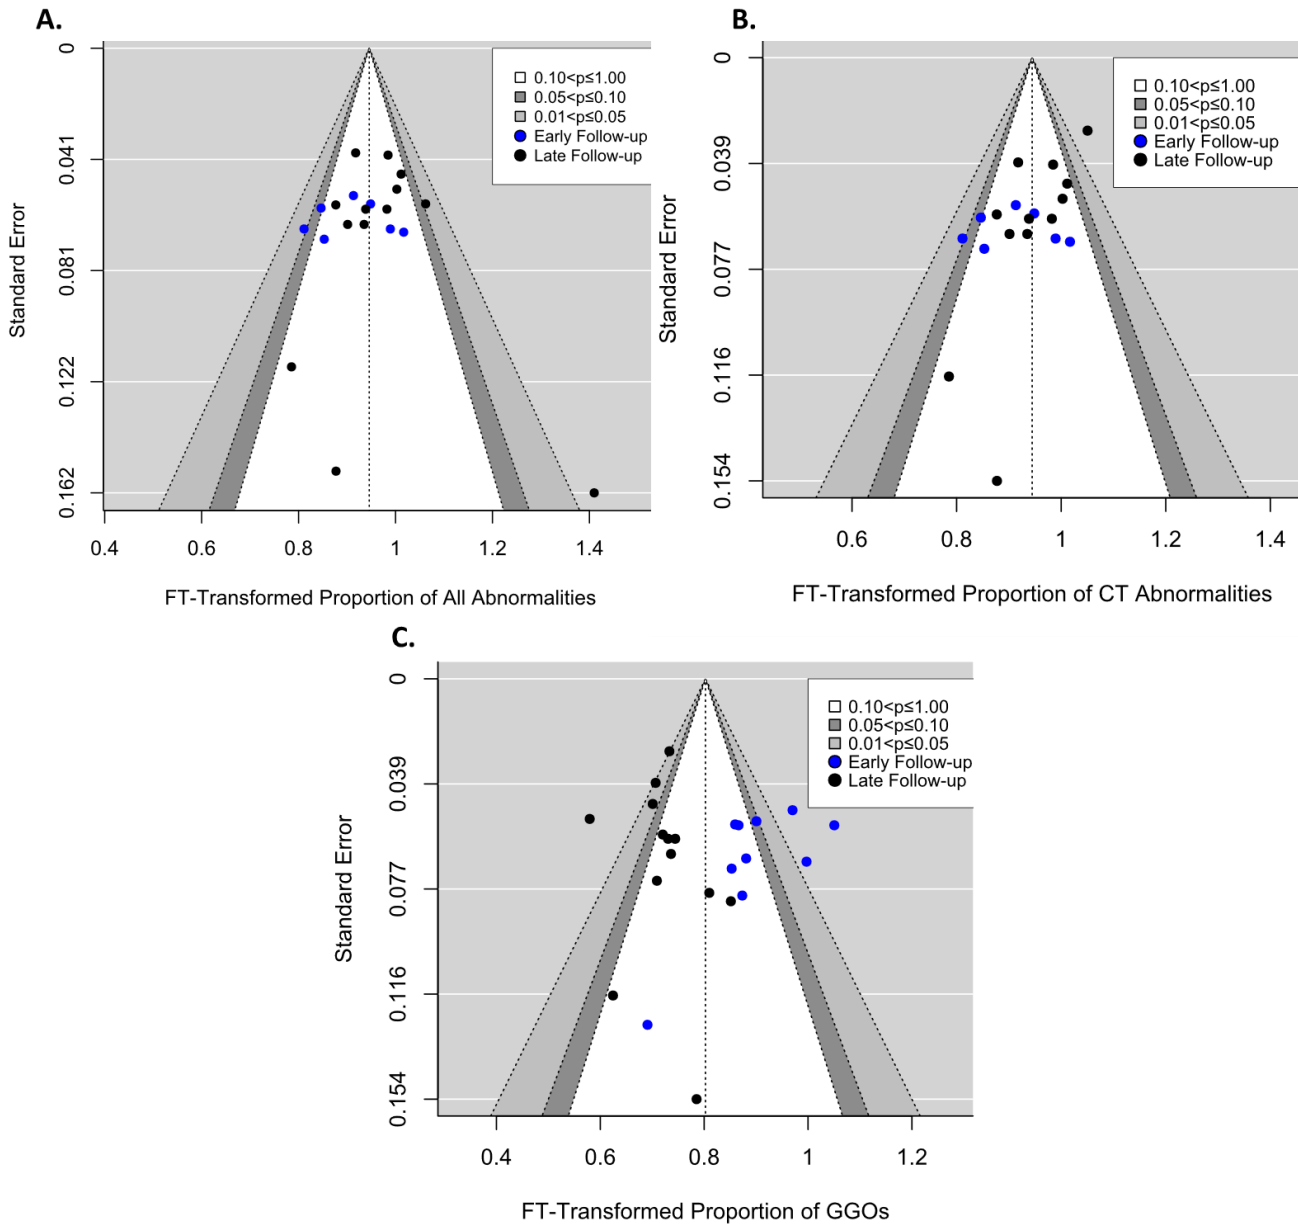

**Figure S9. Funnel plots assessing publication bias of A) All Abnormalities across all modalities, B) CT-only abnormalities, and C) GGOs**
